# Supplementary material
Source: HighWire-hosted journal article supplement (https://www.jrheum.org/highwire/filestream/39293/field_highwire_adjunct_files/0/191209DataSuppl.pdf)

## ONLINE SUPPLEMENTARY DATA

**Supplementary Figure 1.** Study flow chart: Patient disposition for apremilast, methotrexate, and bDMARD initiators with oligoarticular psoriatic arthritis in the Corrona Psoriatic Arthritis/Spondyloarthritis Registry. bDMARD: biologic disease-modifying anti-rheumatic drug.

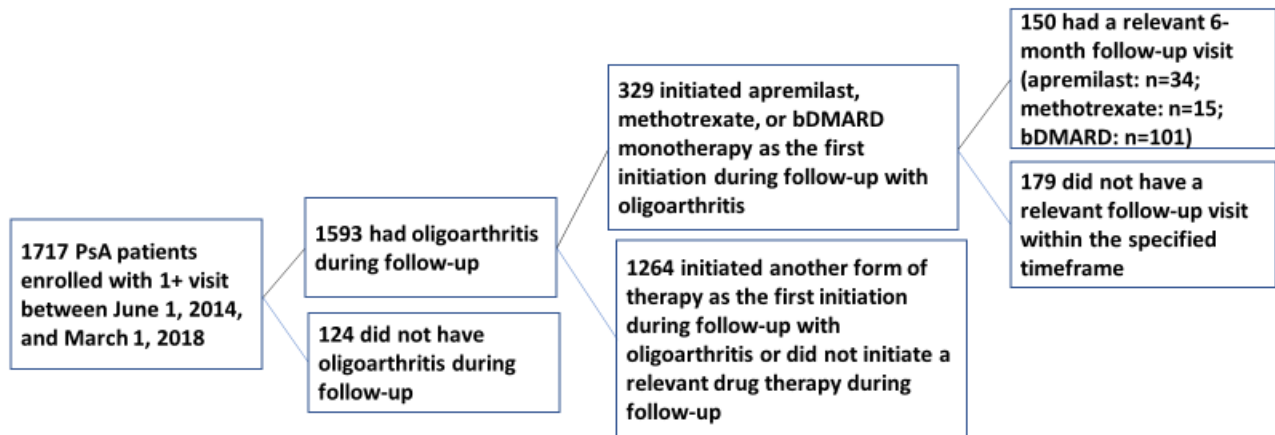

**Supplementary Figure 2. Achievement of HAQ-DI MCID:** Proportion of patients with HAQ-DI score available at baseline achieving  $\geq 0.35$ -point improvement in the Health Assessment Questionnaire-Disability Index minimum clinically important differences at 6 months. bDMARD: biologic disease-modifying anti-rheumatic drug. n/N: number of responders/number of patients with sufficient data for evaluation.

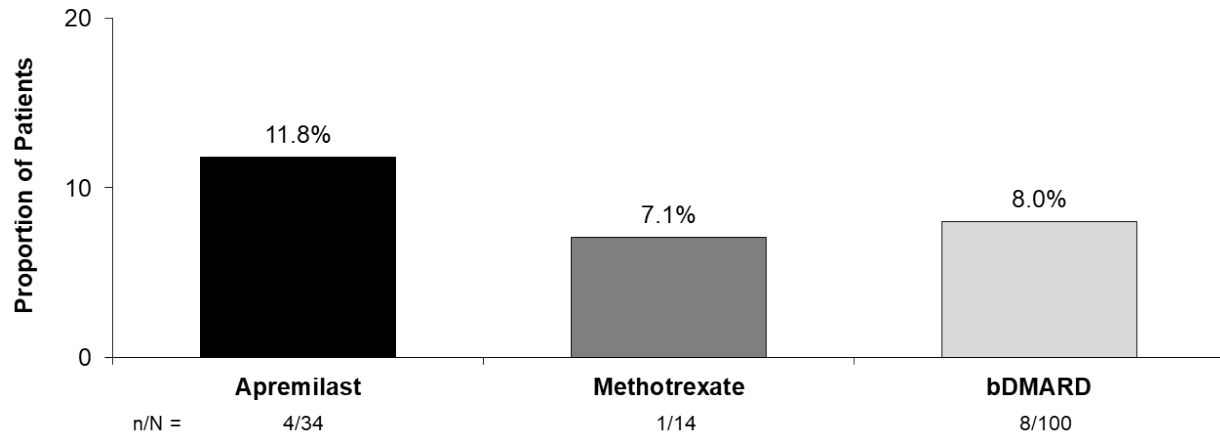

**Supplementary Figure 3. Nail disease complete responders:** Proportion of patients with presence of physician-reported clinical characteristics of nail psoriasis at baseline who were without physician-reported clinical characteristics of nail psoriasis at 6 months. bDMARD: biologic disease-modifying anti-rheumatic drug. n/N=number of responders/number of patients with sufficient data for evaluation.

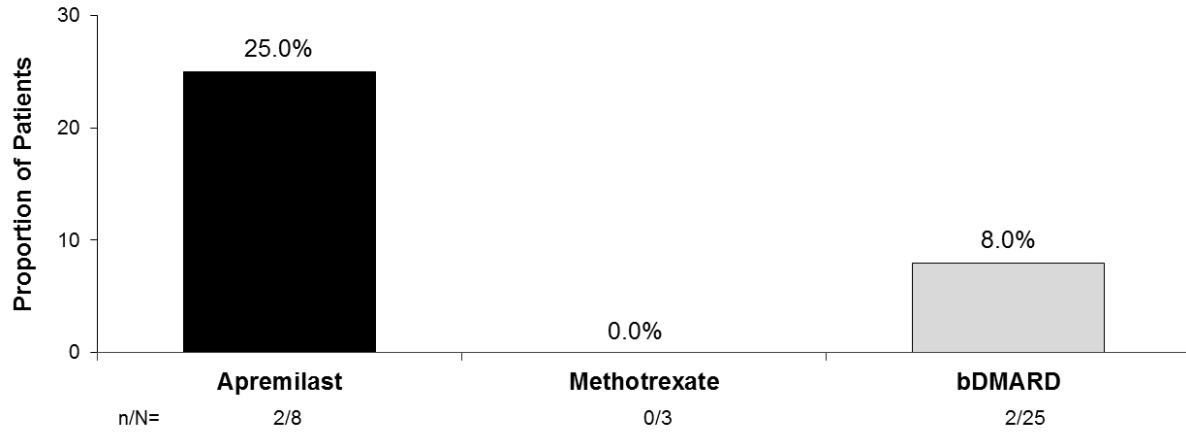

Supplement: 191209DataSuppl.pdf [file 191209DataSuppl.pdf]
